# Supplementary material for: The Influence of Anti-Diabetic Drugs on Prostate Cancer
Source: MDPI journal article supplement (doi:10.3390/cancers13081827), 2021-04-12
Supplement: s1 [file s1]

Supplementary Table 1. Recent meta-analysis concerning the use of metformin and risk and progression of PC.

HR - hazard ratio, pHR- polled hazard ratio, RR - relative risk, OR - odds ratio, 95% CI - 95 % confidence interval, P - p-value, OS - overall survival, CSS - cancer-specific survival, ACM- all cause mortality, CSM- cancer-specific mortality.

| First author / Year of publication | Sample size                                                                                       | No of studies included | Result/ conclusion                                                                                                                                                                                              | Risk of PC incidence                                                                             | Overall survival                           | Cancer-specific survival                 | Recurrence-free survival                 | Risk of recurrence                      | All-cause mortality                                           | Cancer specific mortality                                      | Biochemical recurrence free survival                         |
|------------------------------------|---------------------------------------------------------------------------------------------------|------------------------|-----------------------------------------------------------------------------------------------------------------------------------------------------------------------------------------------------------------|--------------------------------------------------------------------------------------------------|--------------------------------------------|------------------------------------------|------------------------------------------|-----------------------------------------|---------------------------------------------------------------|----------------------------------------------------------------|--------------------------------------------------------------|
| Wang / 2020[64]                    | 2 009 504 male patients with T2DM, more than 100 000 with PC                                      | 24                     | No association between metformin use and PC risk, however, exploratory analyses suggest that metformin use may be protective in a certain subgroup of patients.                                                 | RR = 0.97 (95% CI:0.84-1.12) in case-control and RR = 0.94 (95% CI: 0.79-1.12) in cohort studies |                                            |                                          |                                          |                                         |                                                               |                                                                |                                                              |
| B Ghiassi / 2019[61]               | 877 058                                                                                           | 11                     | Not statistically significant reduction of PC risk among metformin users                                                                                                                                        | OR = 0.89 (95% CI: 0.67-1.17)                                                                    |                                            |                                          |                                          |                                         |                                                               |                                                                |                                                              |
| Zhaohan / 2019[62]                 | 52 328                                                                                            | 18                     | No association between metformin use and PC risk.                                                                                                                                                               | RR = 0.97, (95% CI 0.80-1.16, P = 0.711)                                                         |                                            |                                          |                                          |                                         |                                                               |                                                                |                                                              |
| Chen / 2018[65]                    | 1 572 307 patients in general, 1 171 643 Western and 400 664 Asians                               | 23 - Western 3- Asian  | No association between metformin use and risk of PC, in either Western-based or Asian-based populations (after removing a highly influential Asian-based study)                                                 | RR = 1.01 (95%CI: 0.86-1.18)                                                                     |                                            |                                          |                                          |                                         |                                                               |                                                                |                                                              |
| Wu / 2015[122]                     | 863,769 participants and 39,073 PC                                                                | 10                     | No association between metformin use and prostate cancer risk.                                                                                                                                                  | RR = 0.92 (95% CI: 0.84-1.02, P = 0.112)                                                         |                                            |                                          |                                          |                                         |                                                               |                                                                |                                                              |
| He / 2019[63]                      | 1,660,795                                                                                         | 30                     | No association between metformin use and PC incidence. Metformin therapy significantly improve OS, CSS, RFS                                                                                                     | HR = 0.86 (95% CI: 0.55-1.34, P = 0.51)                                                          | HR = 0.72 (95%CI: 0.59-0.88, P = 0.001)    | HR = 0.78 (95% CI: 0.64-0.94, P = 0.009) | HR = 0.60 (95% CI: 0.42-0.87, P = 0.006) |                                         |                                                               |                                                                |                                                              |
| Deng / 2015[60]                    | 334 532                                                                                           | 13                     | Association between metformin use and significantly decreased incidence of PC, however, not with decreased all-cause mortality or decreased recurrence of PC                                                    | RR = 0.88 (95% CI: 0.78-0.99, P = 0.03)                                                          |                                            |                                          |                                          | RR = 0.90 (95% CI: 0.75-1.09, P = 0.27) | RR = 1.07 (95% CI: 0.86-1.32, P = 0.55)                       |                                                                | RR = 0.90 (95% CI 0.75, 1.09, P = 0.27).                     |
| Cao X / 2017[123]                  | 37 015 diabetic cancer patients                                                                   | 42                     | Association between metformin use and reduced ACM and CSM in diabetic patients with PC.                                                                                                                         |                                                                                                  |                                            |                                          |                                          |                                         | HR = 0.73 (95% CI = 0.68 - 0.79, P < .001)                    | HR = 0.74 (95% CI = 0.64-0.86, P < .001)                       |                                                              |
| Stopsack / 2016[69]                | 9,186 patients                                                                                    | 9                      | Metformin use was associated with improved OS and decreased risk of biochemical recurrence.                                                                                                                     |                                                                                                  | HR = 0.88 (95 % CI: 0.86-0.90, p < 0.001)  |                                          |                                          |                                         |                                                               | HR = 0.76 (95 % CI 0.44-1.31, P = 0.33)                        | HR = 0.79 (95 % CI 0.63-1.00, P = 0.047)                     |
| Hwang / 2015[70]                   | -                                                                                                 | 8                      | Metformin use increase risk of cancer recurrence, compared with those who not used metformin. A similar trend was observed for other outcomes, but their relationships did not reach statistical significance.  |                                                                                                  |                                            |                                          |                                          | RR = 1.20 (95%CI: 1.00-1.44)            |                                                               |                                                                |                                                              |
| Y Xiao / 2017[68]                  | 177,490                                                                                           | 13                     | Metformin user was associated with improved OS and CSS                                                                                                                                                          |                                                                                                  | HR = 0.79 (95% CI: 0.63–0.98) in 8 studies |                                          |                                          |                                         |                                                               | HR = 0.76 (95% CI: 0.57–1.02) in 6 studies                     |                                                              |
| Raval / 2015[66]                   | -                                                                                                 | 9                      | Marginally association between metformin use and reduction in the risk of biochemical recurrence. Metformin use was not significantly associated with metastases all-cause mortality and PC -specific mortality |                                                                                                  |                                            |                                          |                                          |                                         | pHR = 0.86 (95% CI : 0.67-1.10, P=0.23, I2: 73%) in 6 studies | pHR= 0.76, (95% CI: 0.43 -1.33, P = 0.33, I2=60%) in 4 studies | pHR = 0.82 (95% CI: 0.67, 1.01, P=0.06, I2=25%) in 5 studies |
| C.Coyle / 2016[67]                 | RFS 9330 patients in 6 studies<br>OS 4457 patients in 4 studies<br>CSS 1643 patients in 3 studies |                        | Metformin use demonstrated a borderline significant improvement in RFS , and significant improvements in OS and CSS in PC patients arm                                                                          |                                                                                                  | HR = 0.82 (95% CI: 0.73–0.93)              |                                          | HR = 0.83, (95% CI 0.69–1.00)            |                                         |                                                               | HR = 0.58 (95% CI 0.37–0.93)                                   |                                                              |
